# Supplementary material for: Predicting Total Knee Replacement from Symptomology and Radiographic Structural Change Using Artificial Neural Networks—Data from the Osteoarthritis Initiative (OAI)
Source: PubMed Central journal article supplement (PMC7288322; doi:10.3390/jcm9051298), 2020-05-01
Supplement: jcm-09-01298-s001.pdf [file jcm-09-01298-s001.pdf]

**Supplementary material: The Mathematical Basis**

Body mass index is ranging from 21–44, KL grades from 1-4, medication is coded as 1 if any, used for pain, aching or stiffness and 0 otherwise. Womac total is ranging from 0 to 70 and pain intensity from 0 to 10.

1. Let  $X_1$  be the input vector with  $X_1=(\text{BMI, KLG, medication, womac total, pain intensity})$  and  $g:=(g_1, g_2, g_3, g_4, g_5)$  be the minimax transformation with  $g_1(X_1)=-0.942+0.04464 \text{ BMI}$ ,  $g_2(X_1)=-0.333+0.333 \text{ KLG}$ ,  $g_3(X_1)=\text{medication}$ ,  $g_4(X_1)=0.01447 \text{ womac total}$  and  $g_5(X_1)=0.1 \text{ pain intensity}$ . Let  $X_2=(-1, g(X_1))$ ,  $h$  be the activation function with  $h(x)=(1+\text{Exp}(-x))^{-1}$  and  $W_1$  the weight matrix

$$W_1 = \begin{pmatrix} -1.1497 & -1.16983 & 0.714297 & -0.2071 & -0.1417 \\ -0.1486 & -0.269 & 3.01519 & 0.09788 & 1.41995 \\ 3.83908 & 0.433202 & 3.44988 & 1.05708 & -1.48424 \\ -1.23185 & -0.3312 & -1.62882 & 0.447729 & -1.51218 \\ -5.27405 & 0.07767 & 5.58068 & 2.32511 & -2.34568 \\ 3.22912 & 0.639357 & 1.03647 & -0.3097 & 3.2952 \end{pmatrix}$$

We define  $X_3:=W_1^T.X_2$  and  $X_4:=(h(X_{3,1}), h(X_{3,2}), h(X_{3,3}), h(X_{3,4}), h(X_{3,5}))$ . The second weight matrix is given by

$$W_2 = (-0.1118 \quad -5.703198 \quad -0.9107 \quad 5.097852 \quad 2.661026 \quad -2.440197)$$

Now let  $X_4:=W_2.(-1, X_4)$  and  $X_5:=(h(X_{4,1}), h(X_{4,2}), h(X_{4,3}), h(X_{4,4}), h(X_{4,5}))$ .

The artificial neural network uses the following decision rule: if  $X_4 < 0.35$ , then TKR  $\leq 2$  years is predicted, if  $0.35 \leq X_4 \leq 0.75$ , then no prediction is made and if  $0.75 < X_4$ , then TKR  $> 2$  years is predicted.
